# Supplementary material for: Flux density measurements of gigahertz-peaked spectra candidate pulsars at 610 MHz using an interferometric imaging technique
Source: Oxford University Press journal article supplement (doi:10.1093/mnras/stv333), 2015-03-26

The contour maps presented below were used to estimate flux densities of PSRs B1750–24, B1800–21, B1815–14, B1822–14, B1823–13 and B1849+00 at 610 MHz. The pulsars are presented at field centers. Data were recorded using the GMRT on 30 December 2012, 6 January 2013 and 13 January 2013. The oval in the lower left corner of each contour map indicates the beam size. Contour levels are given in the figure notes.

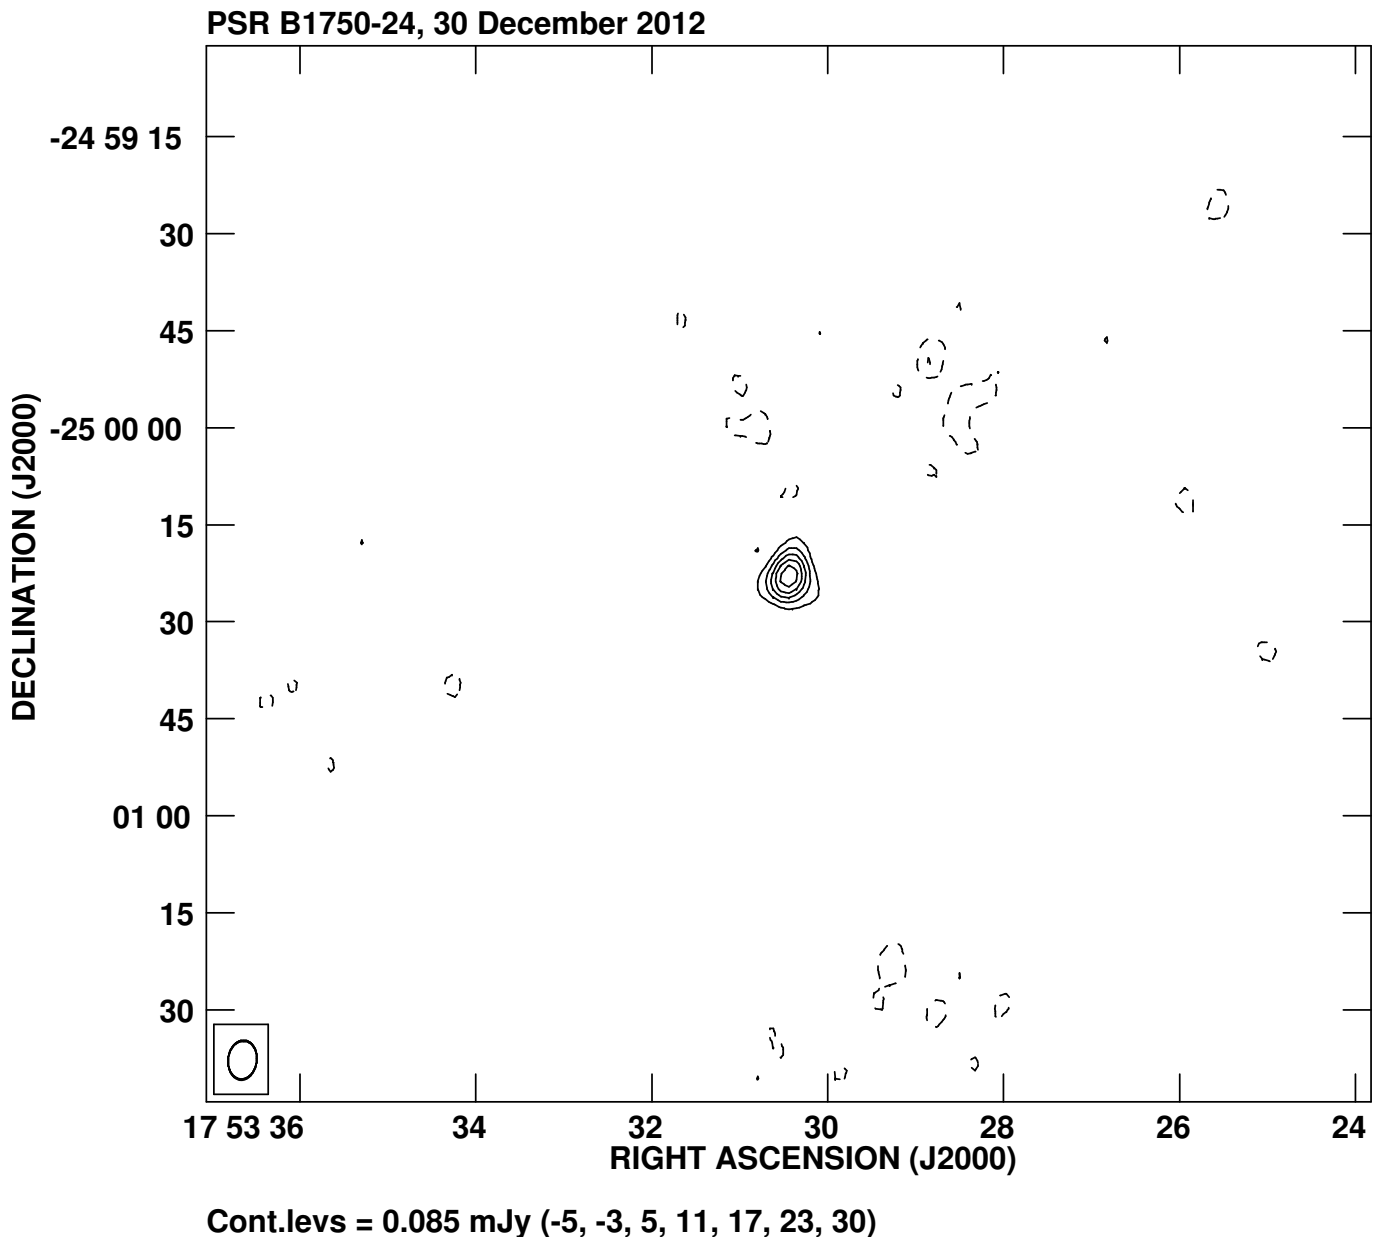

**PSR B1750-24, 06 January 2013**

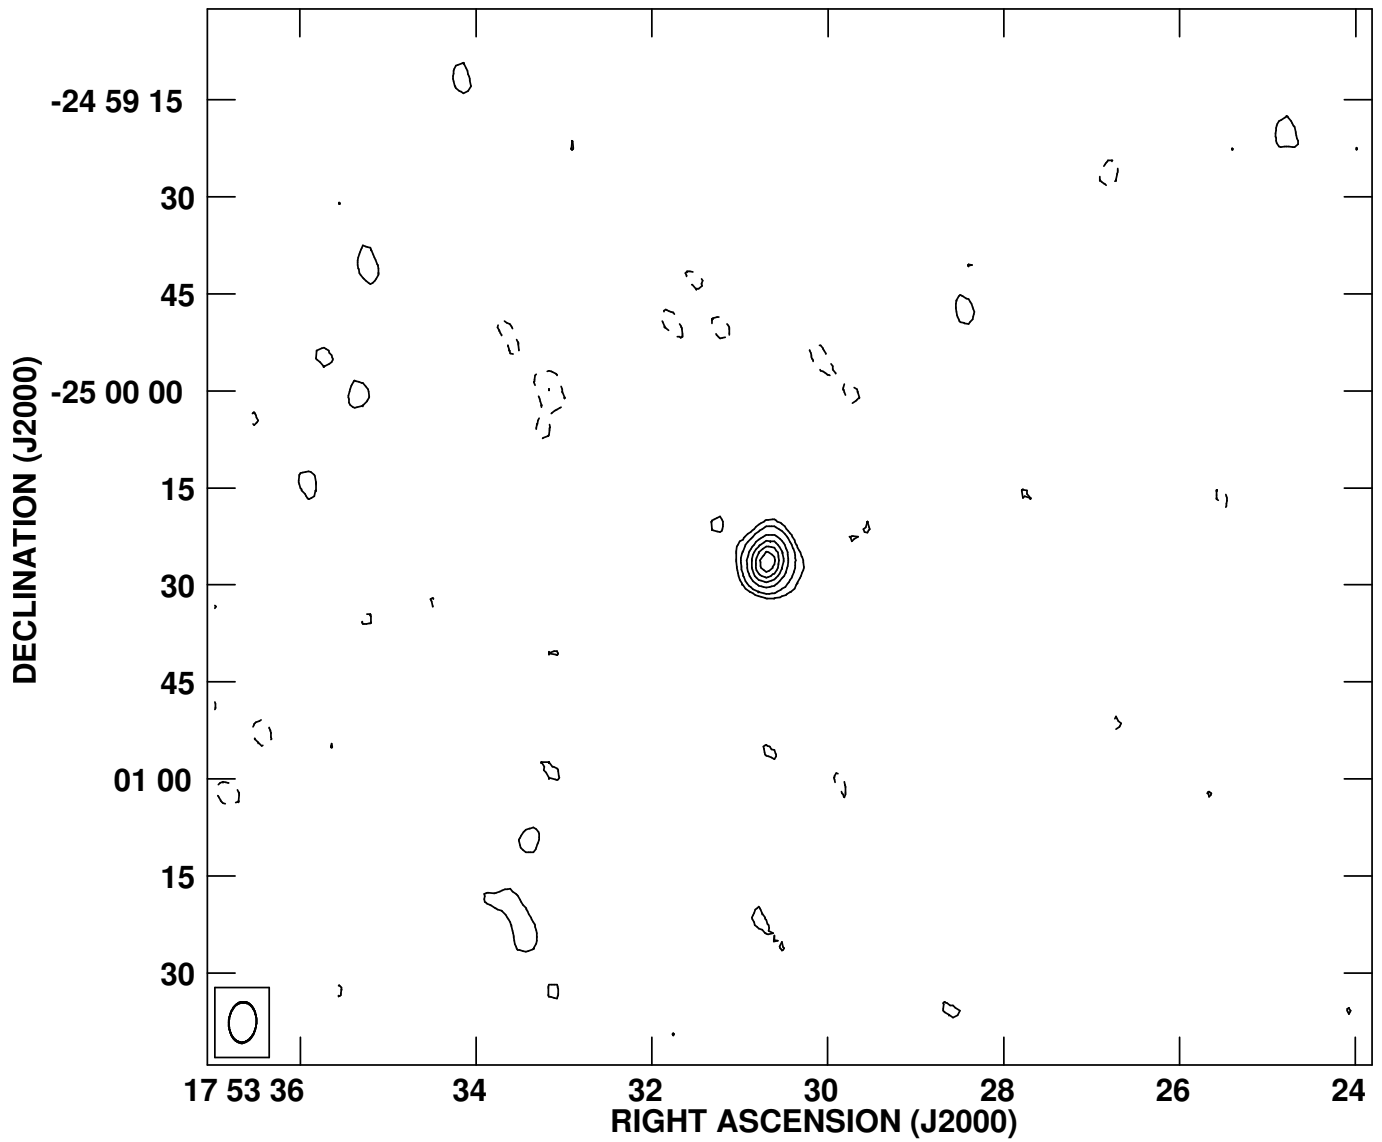

**Cont. levls = 0.09 mJy (-5, -3, 3, 6, 12, 18, 24, 30)**

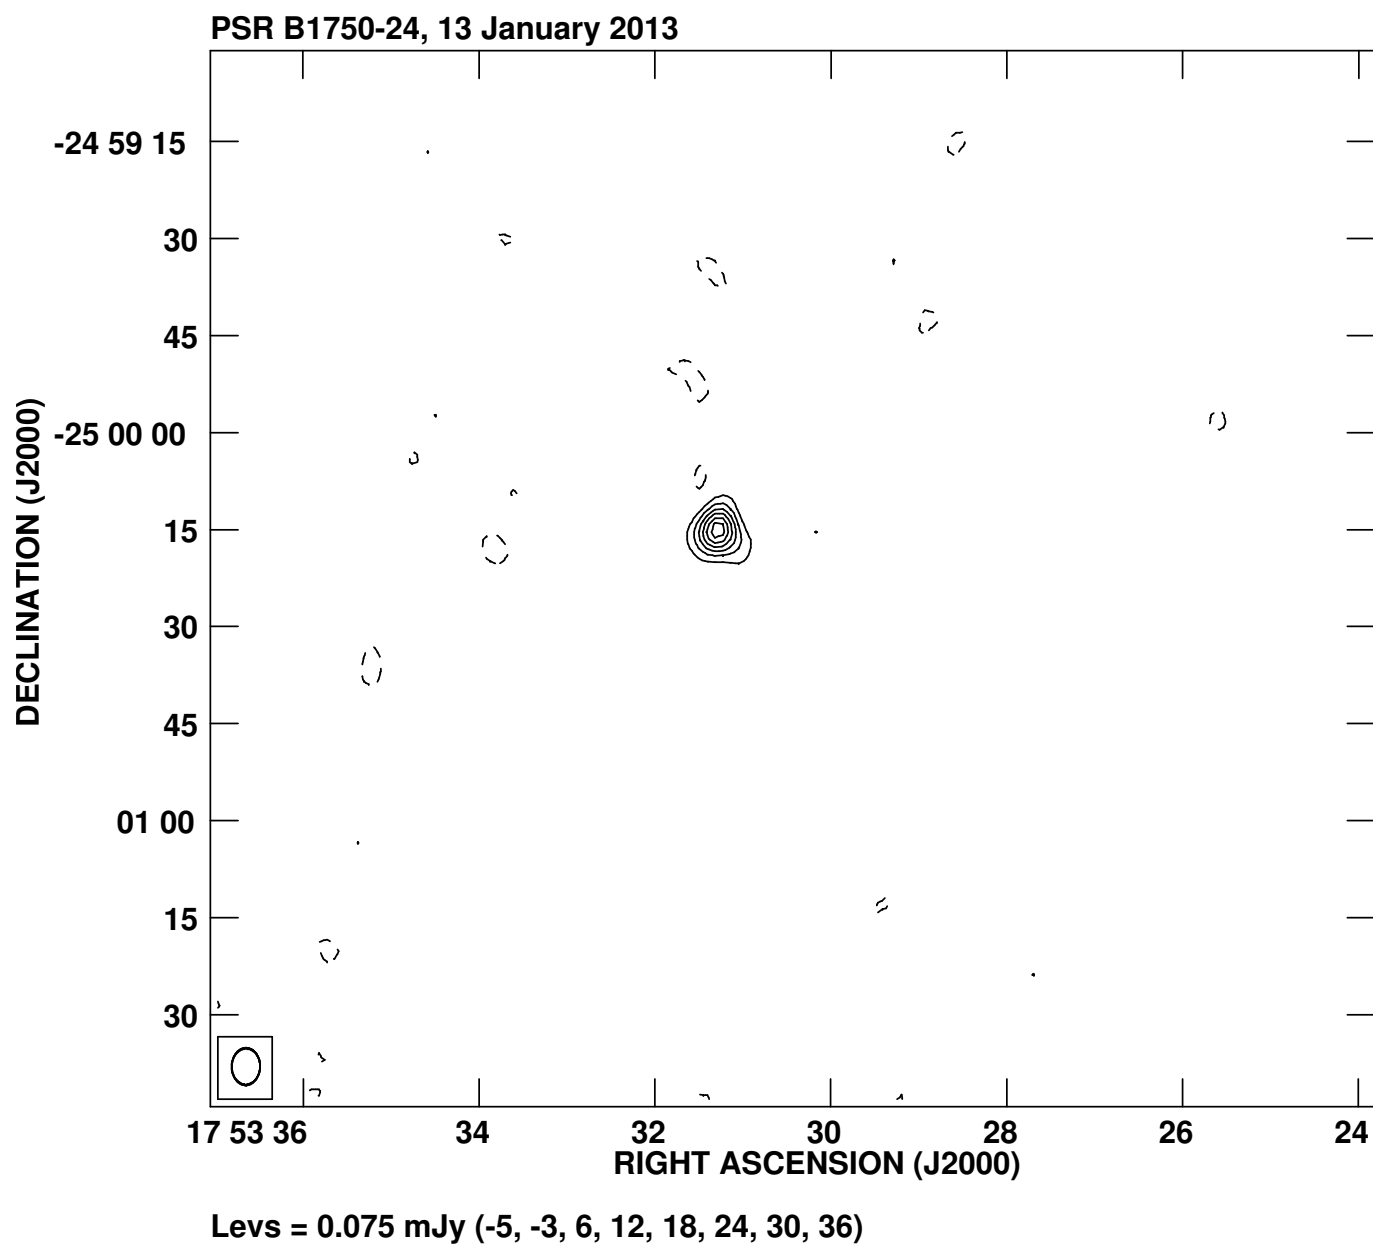

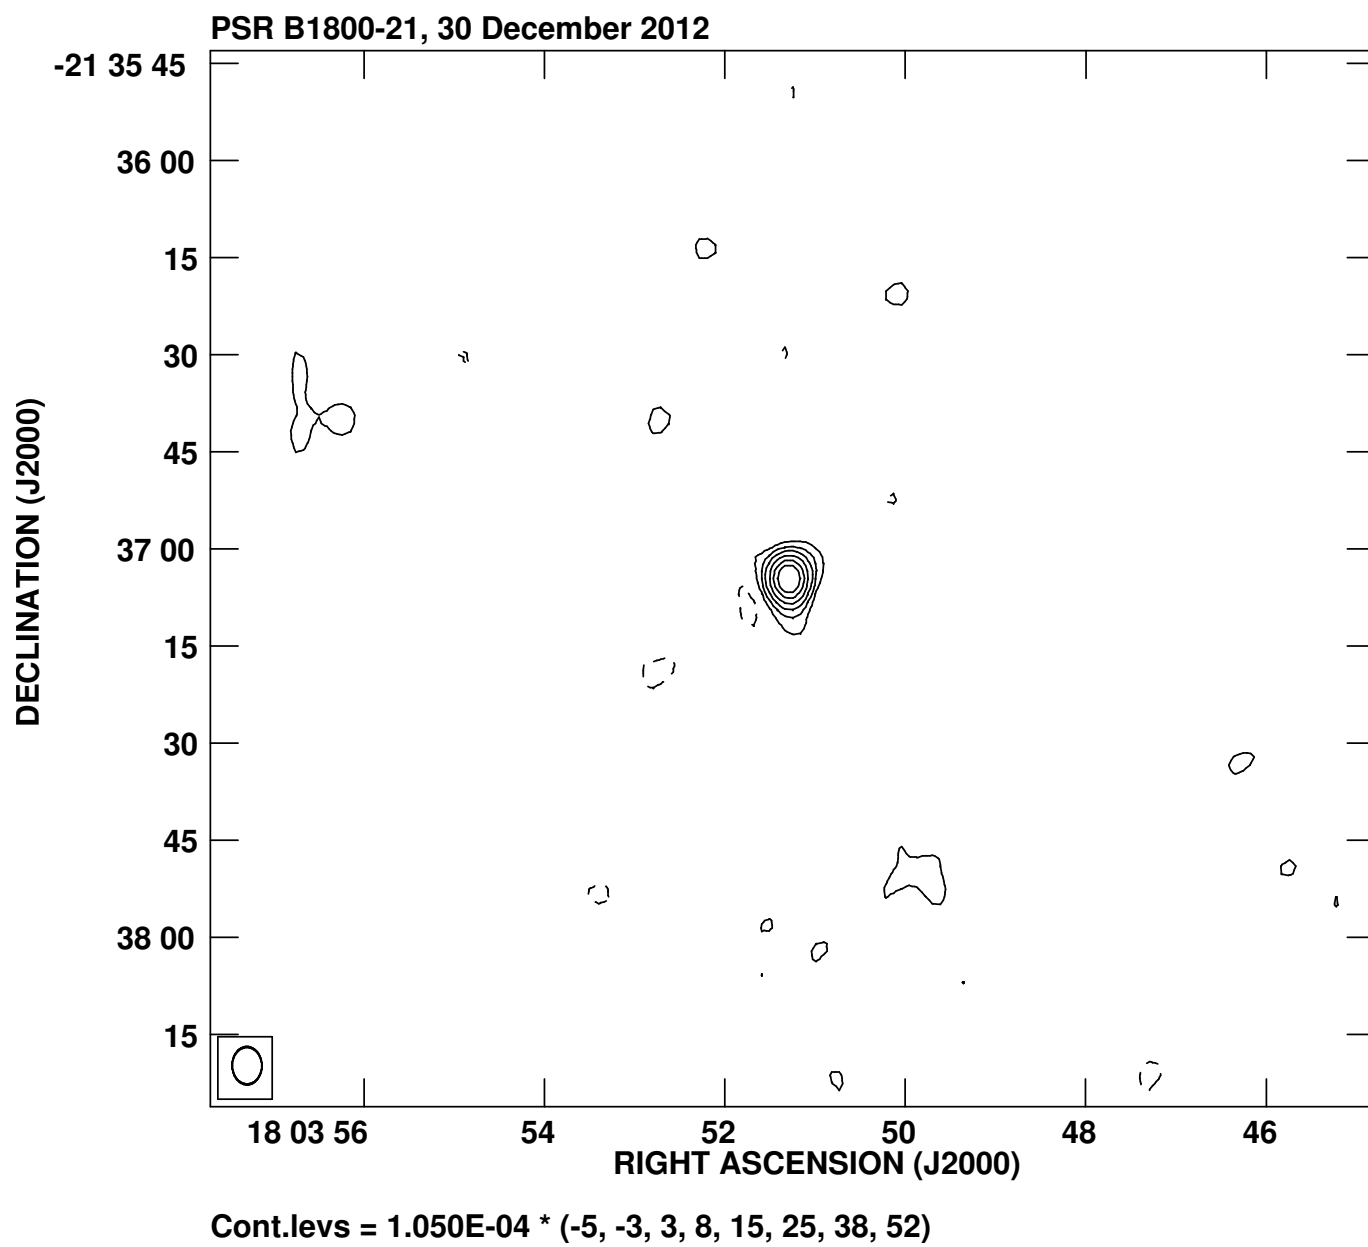

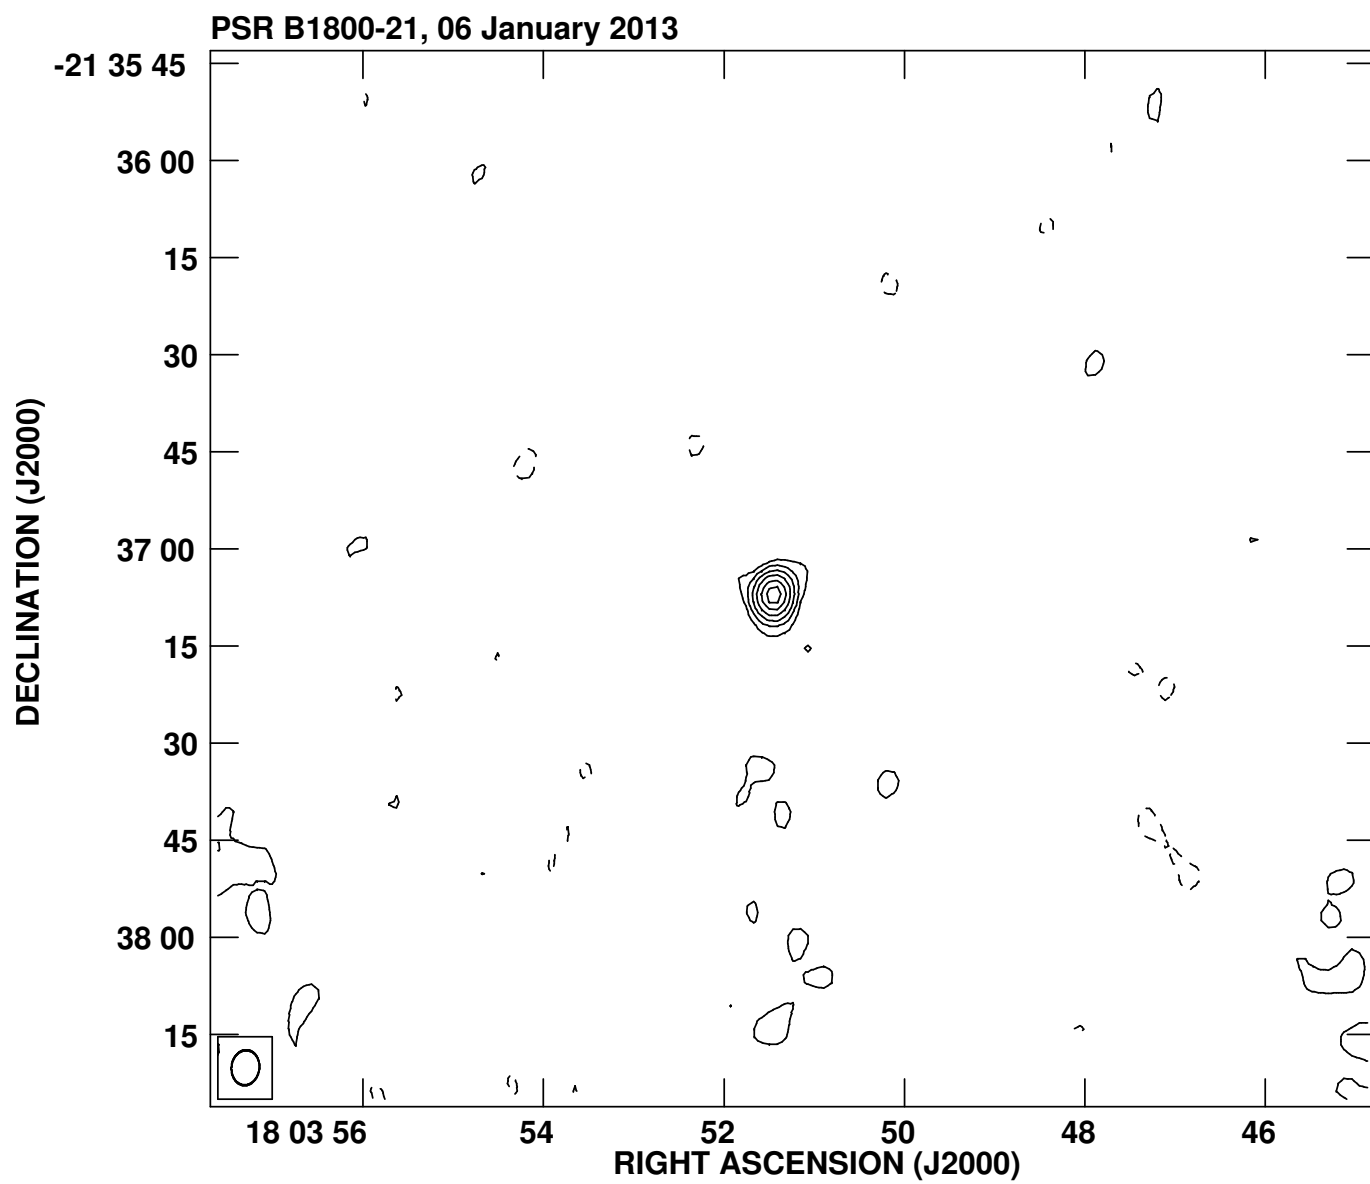

Cont.levs = 0.105 mJy (-5, -3, 3, 8, 15, 25, 38, 52)

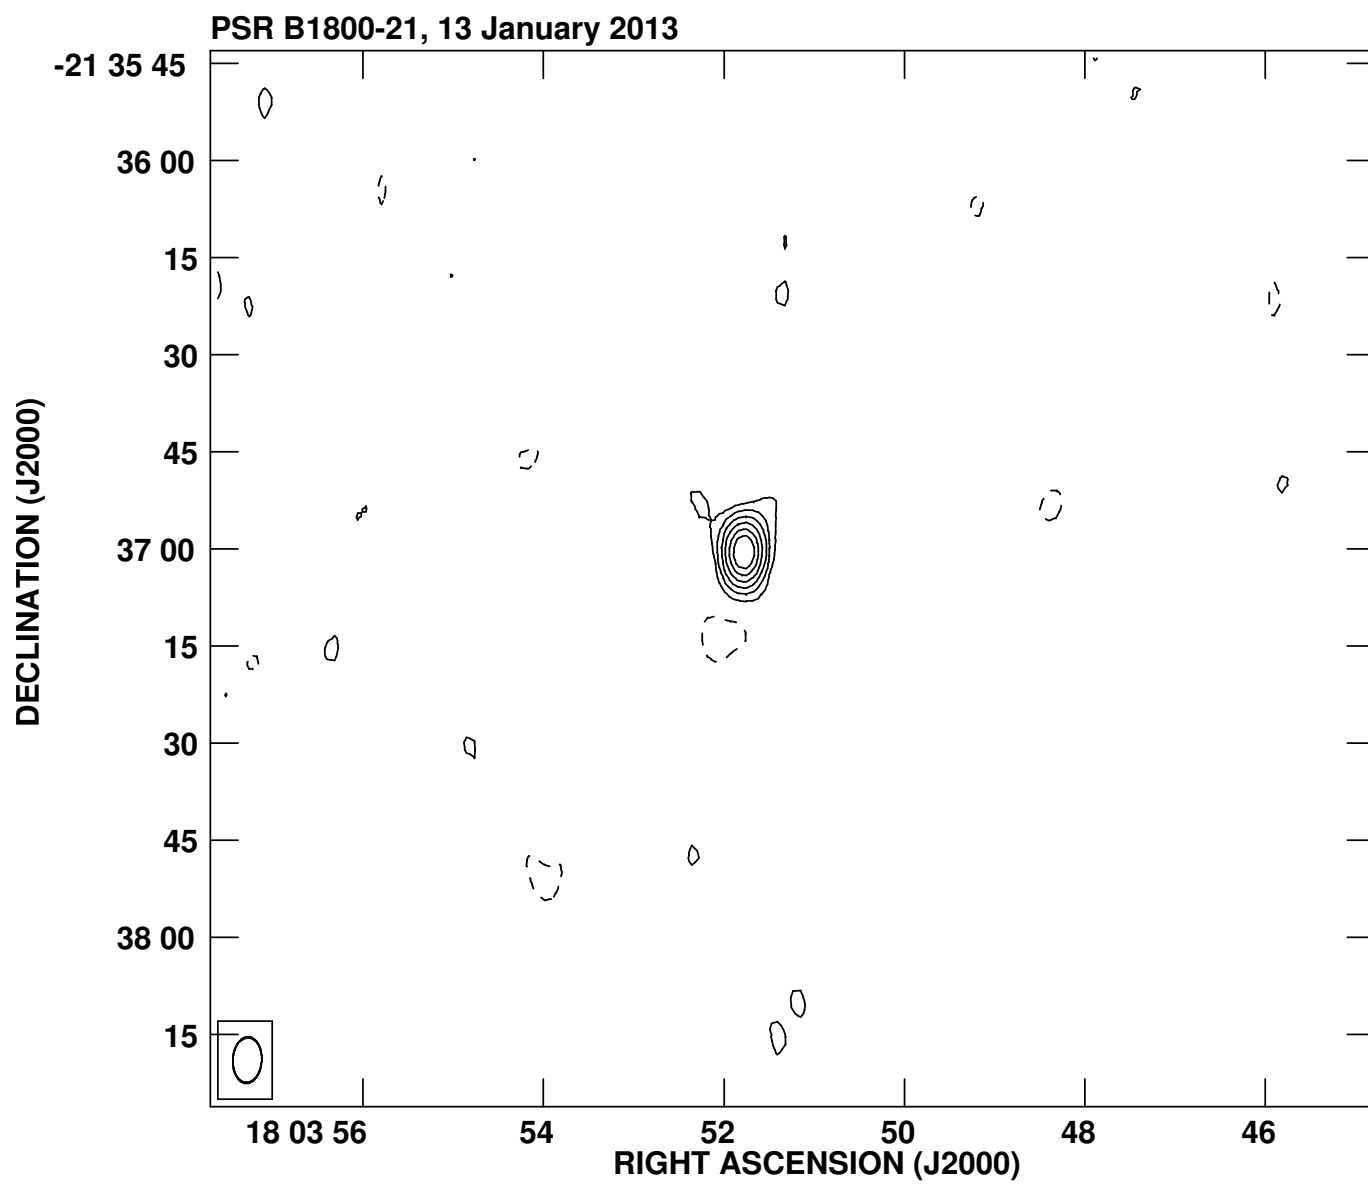

Cont.levs = 0.1 mJy (-5, -3, 3, 8, 15, 25, 38, 52)

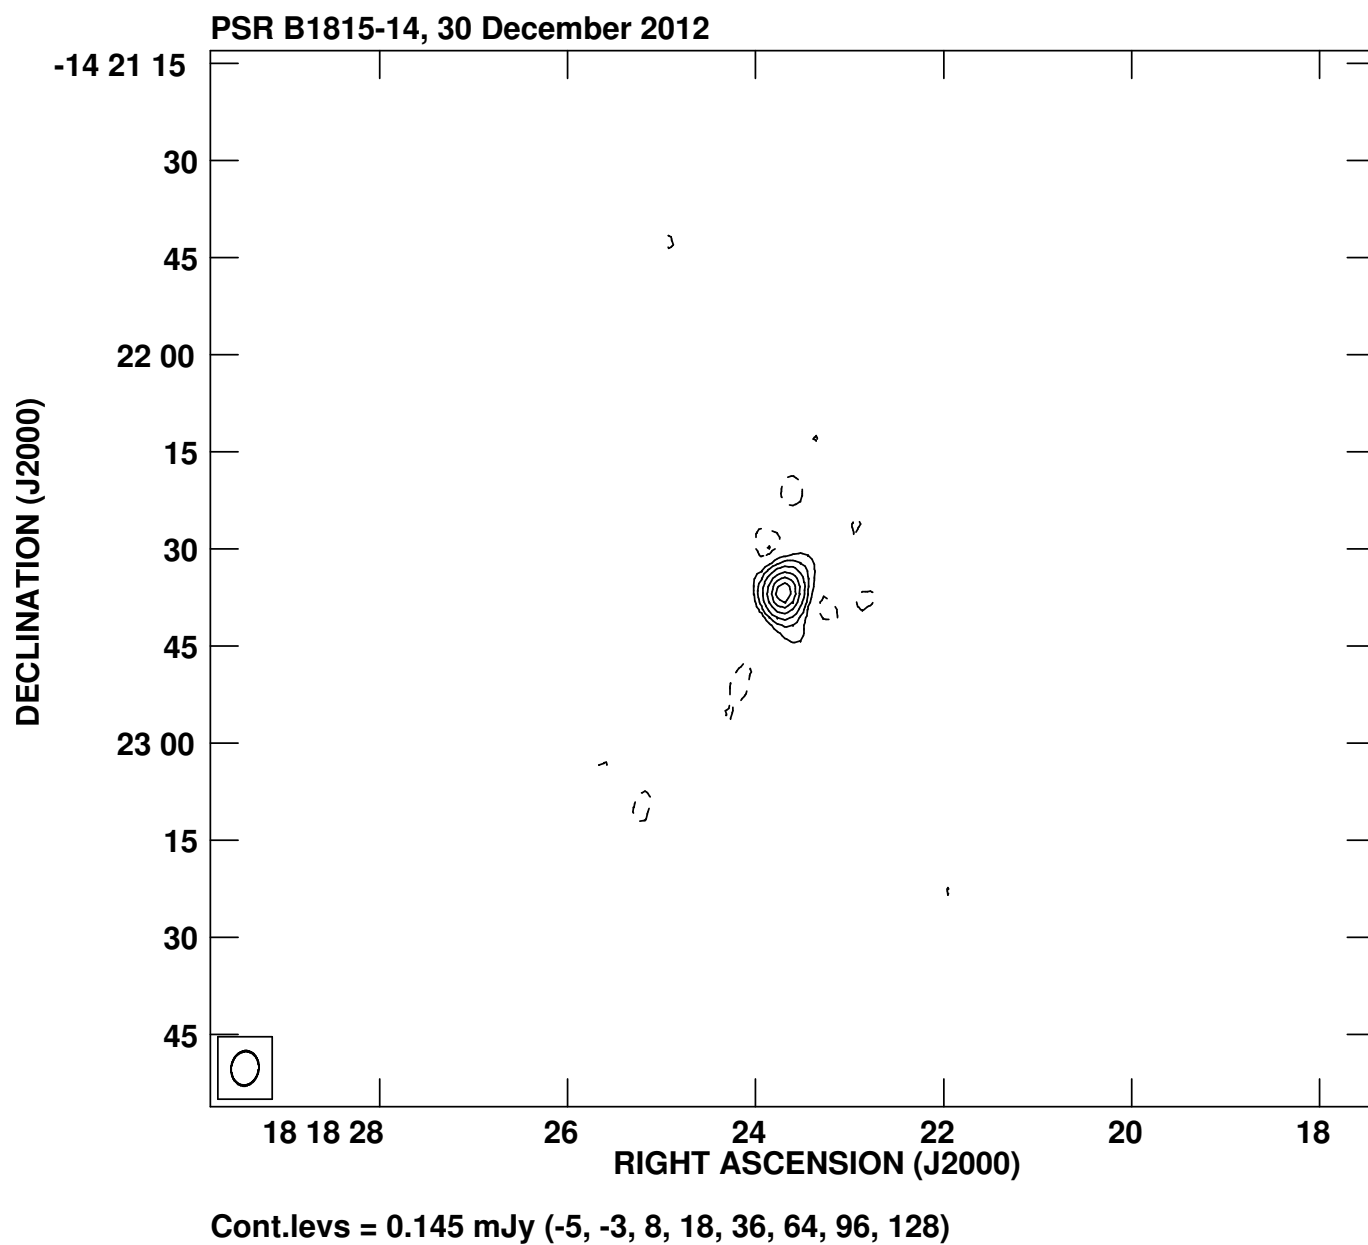

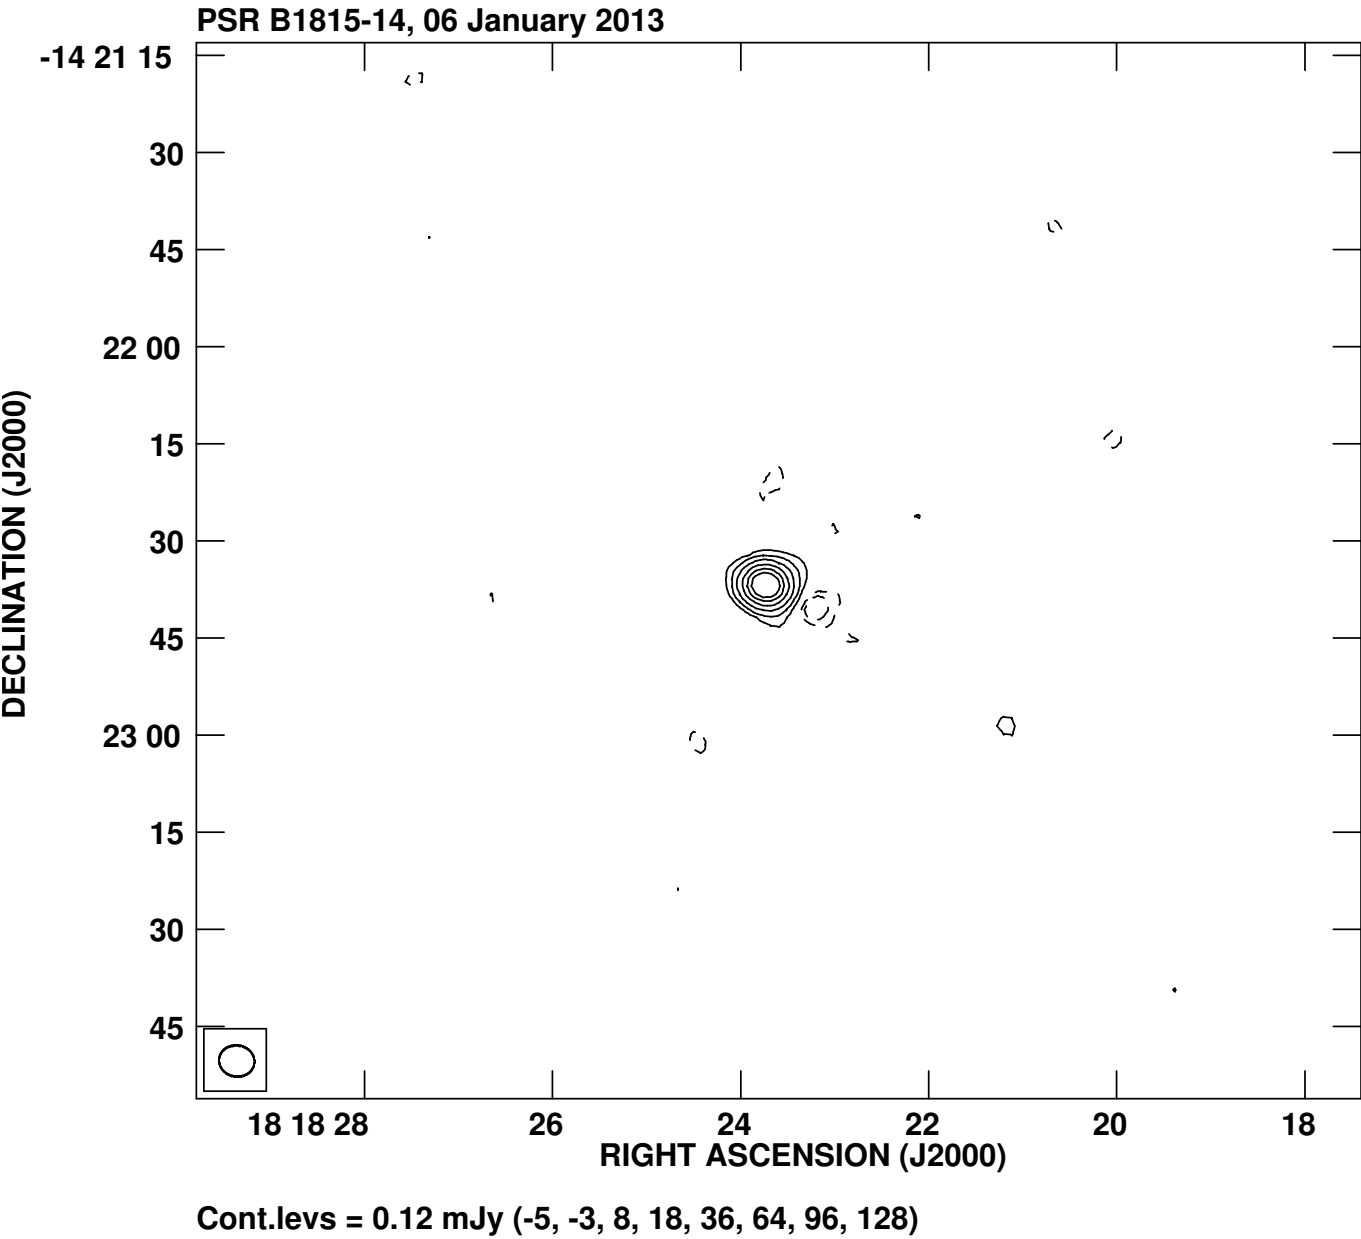



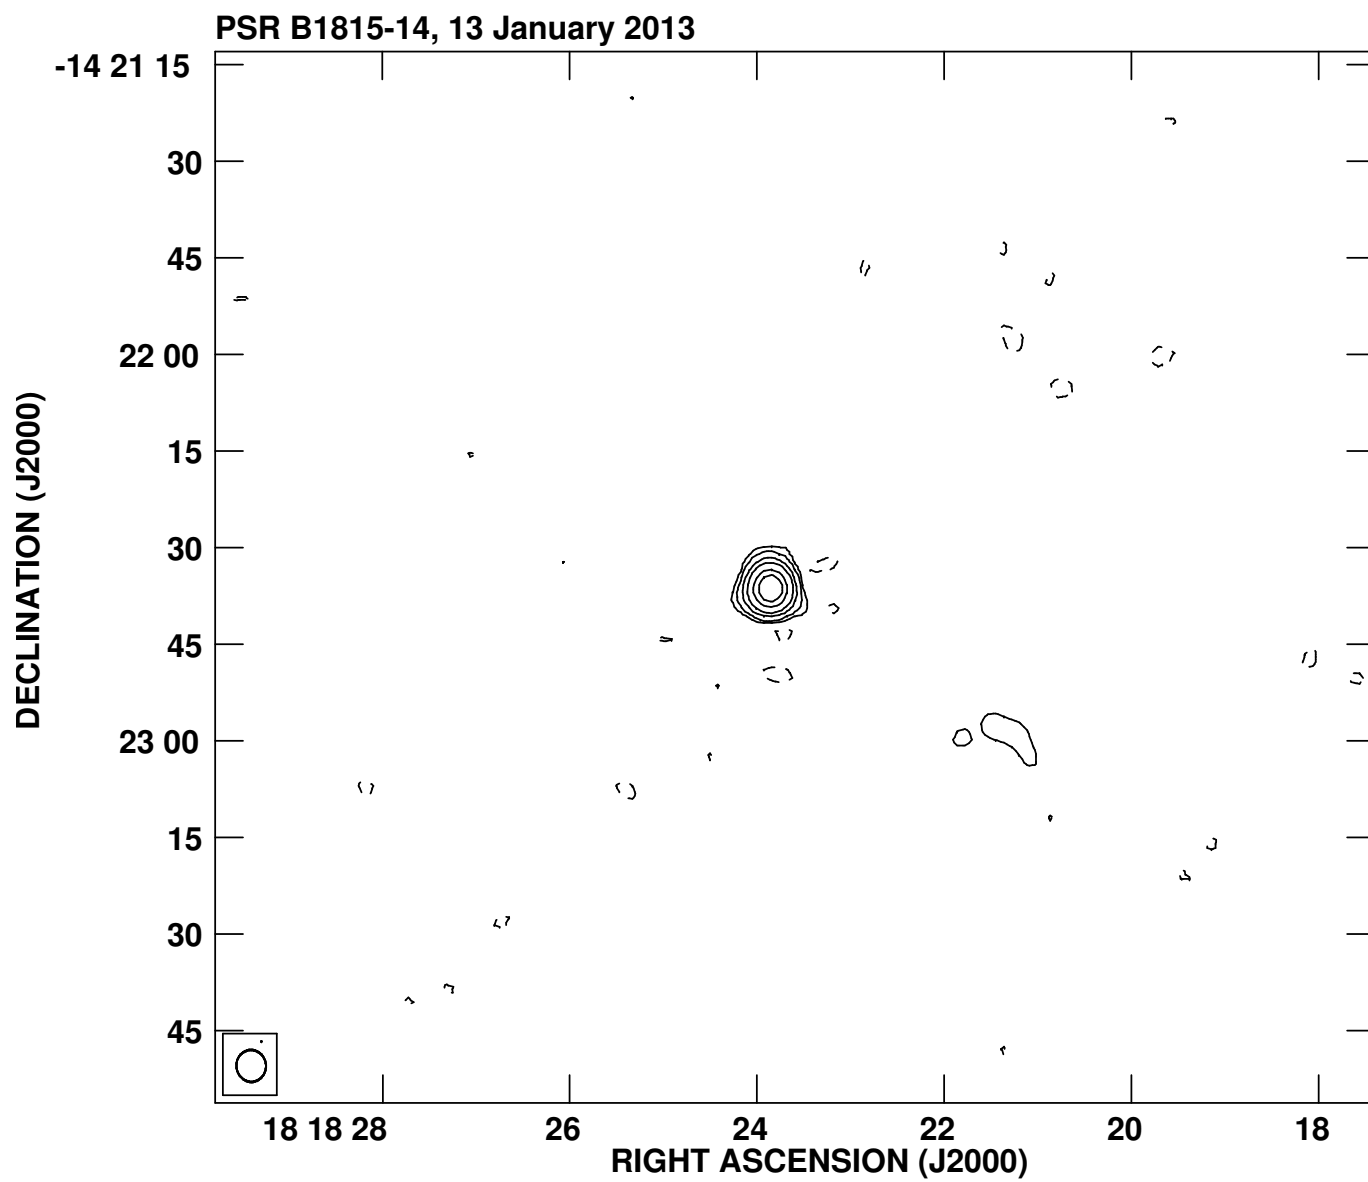

Cont.levs = 0.08 mJy (-5, -3, 8, 16, 36, 64, 128, 196)

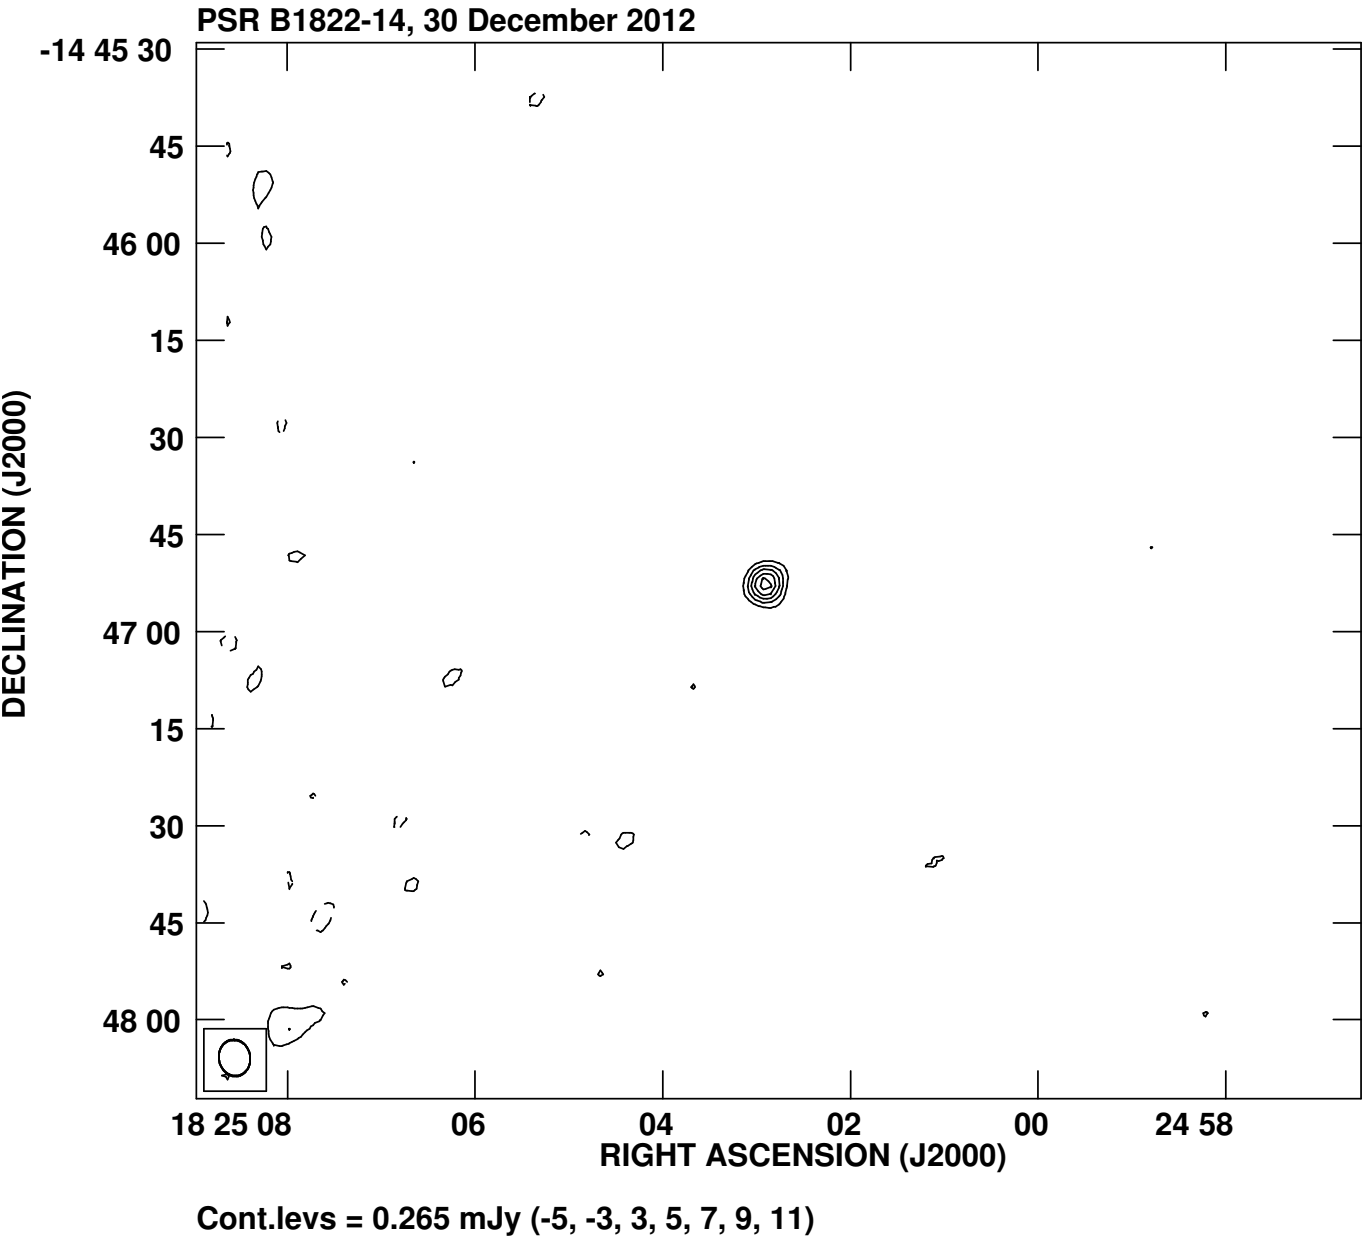

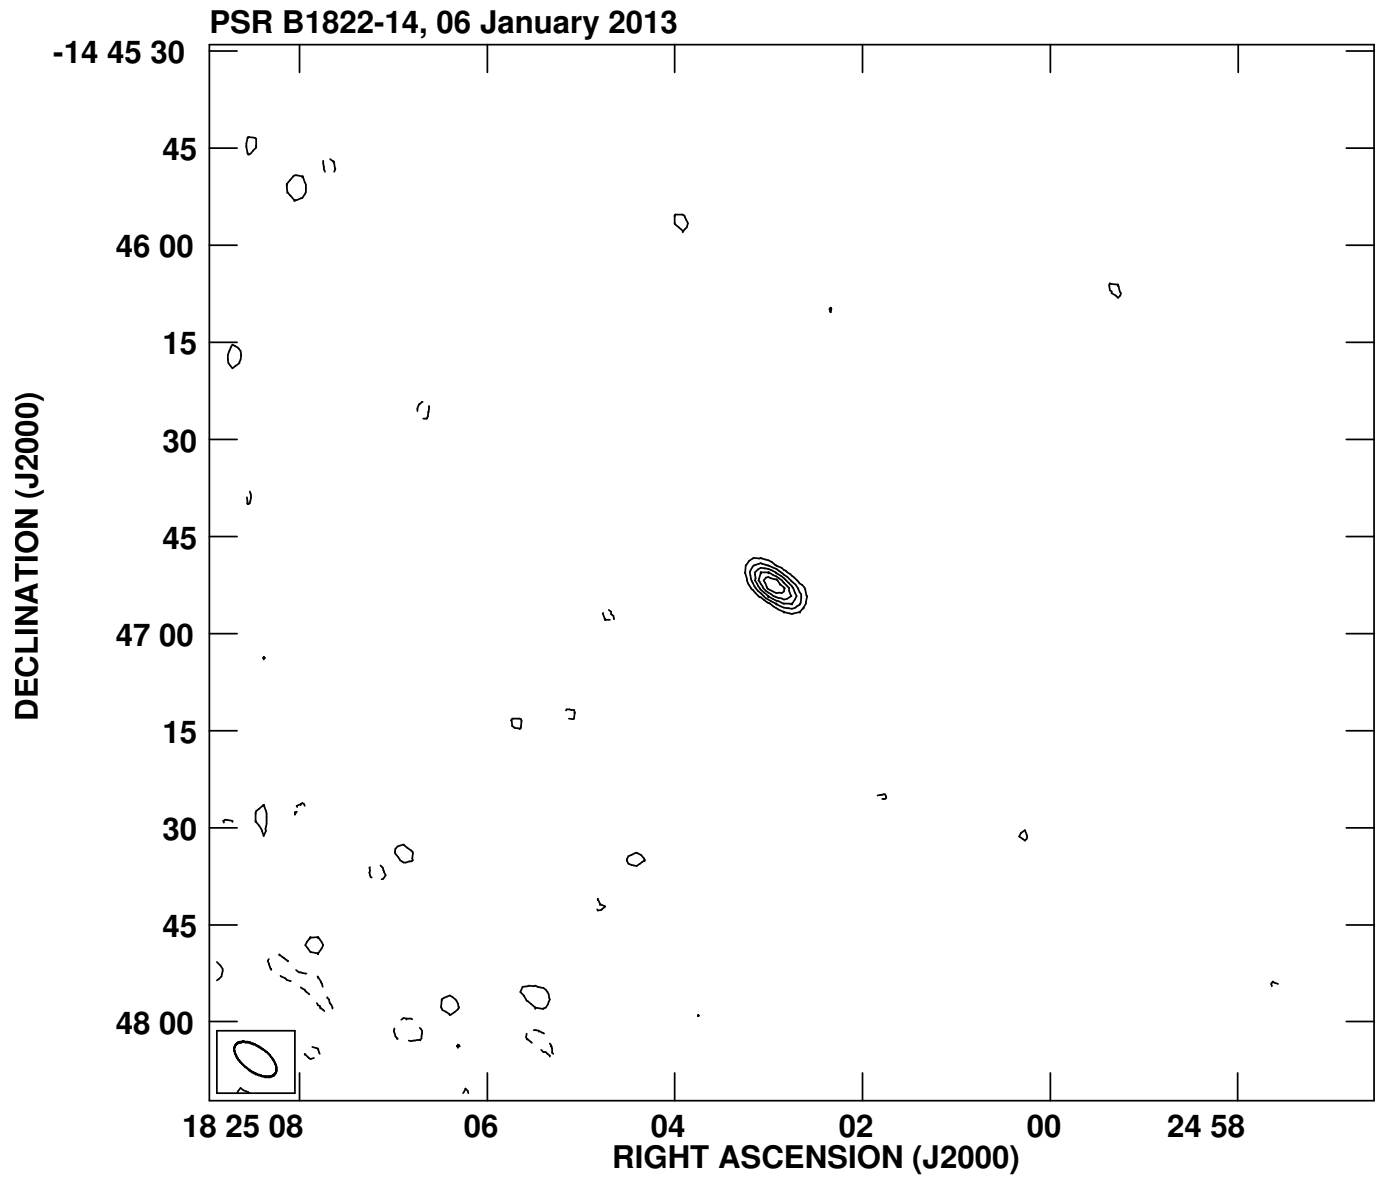

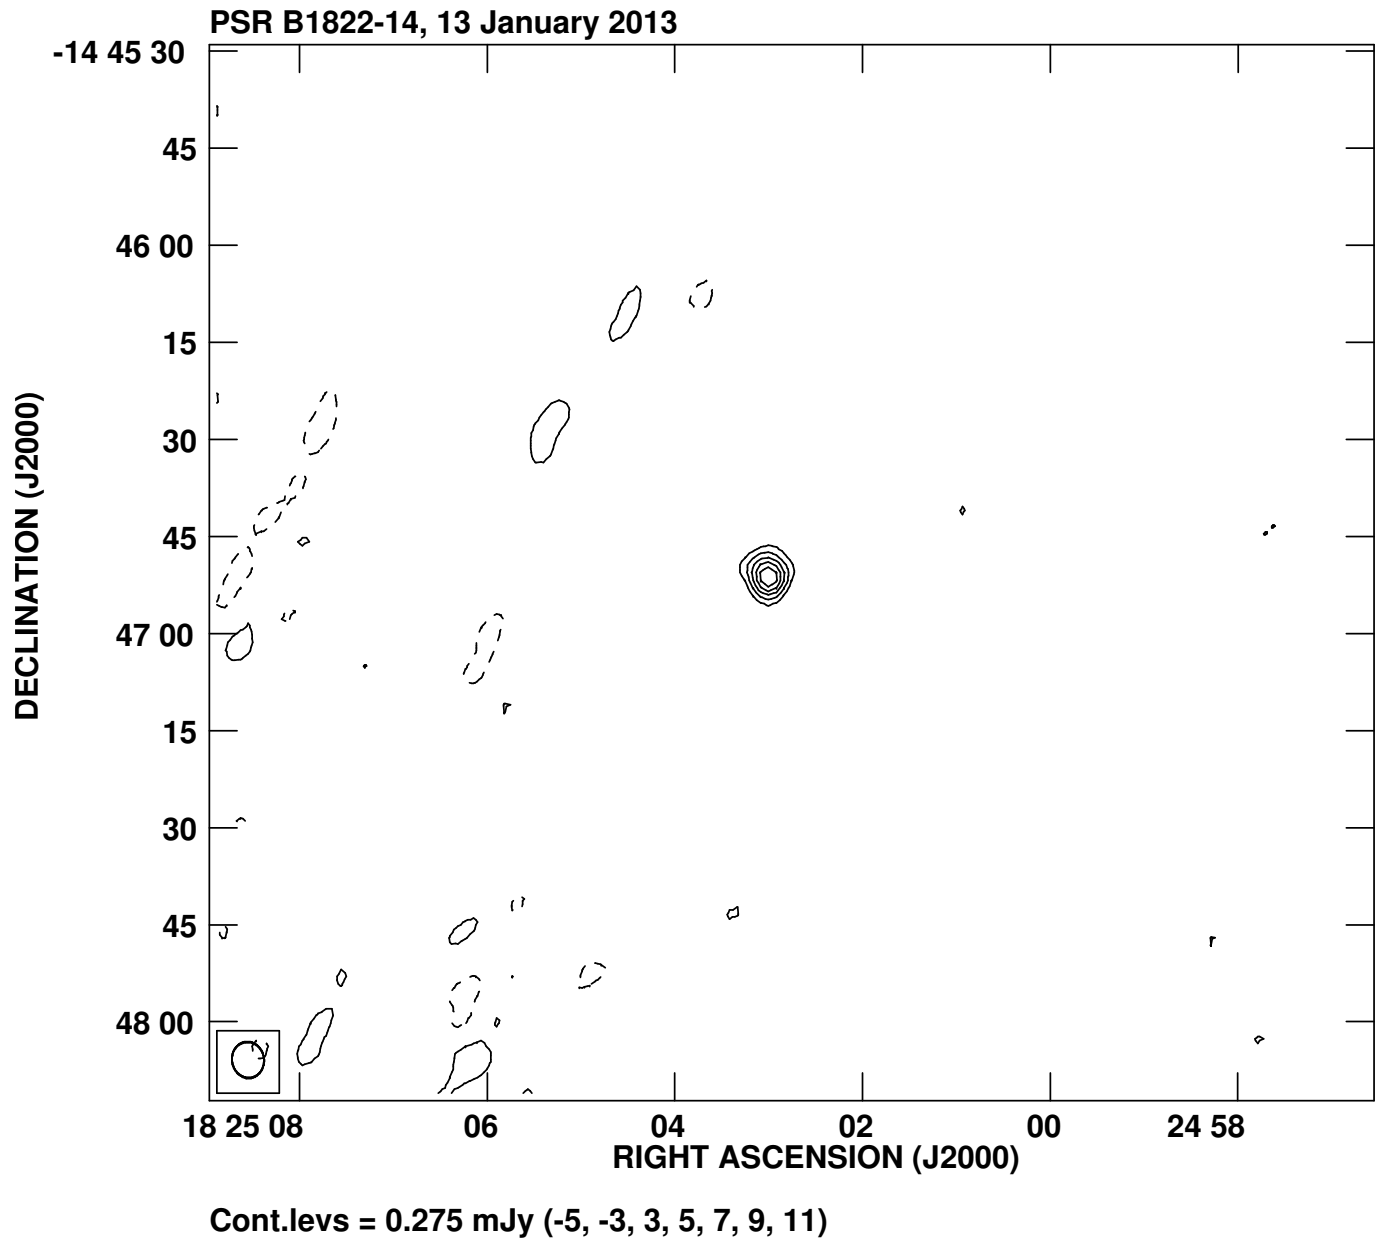

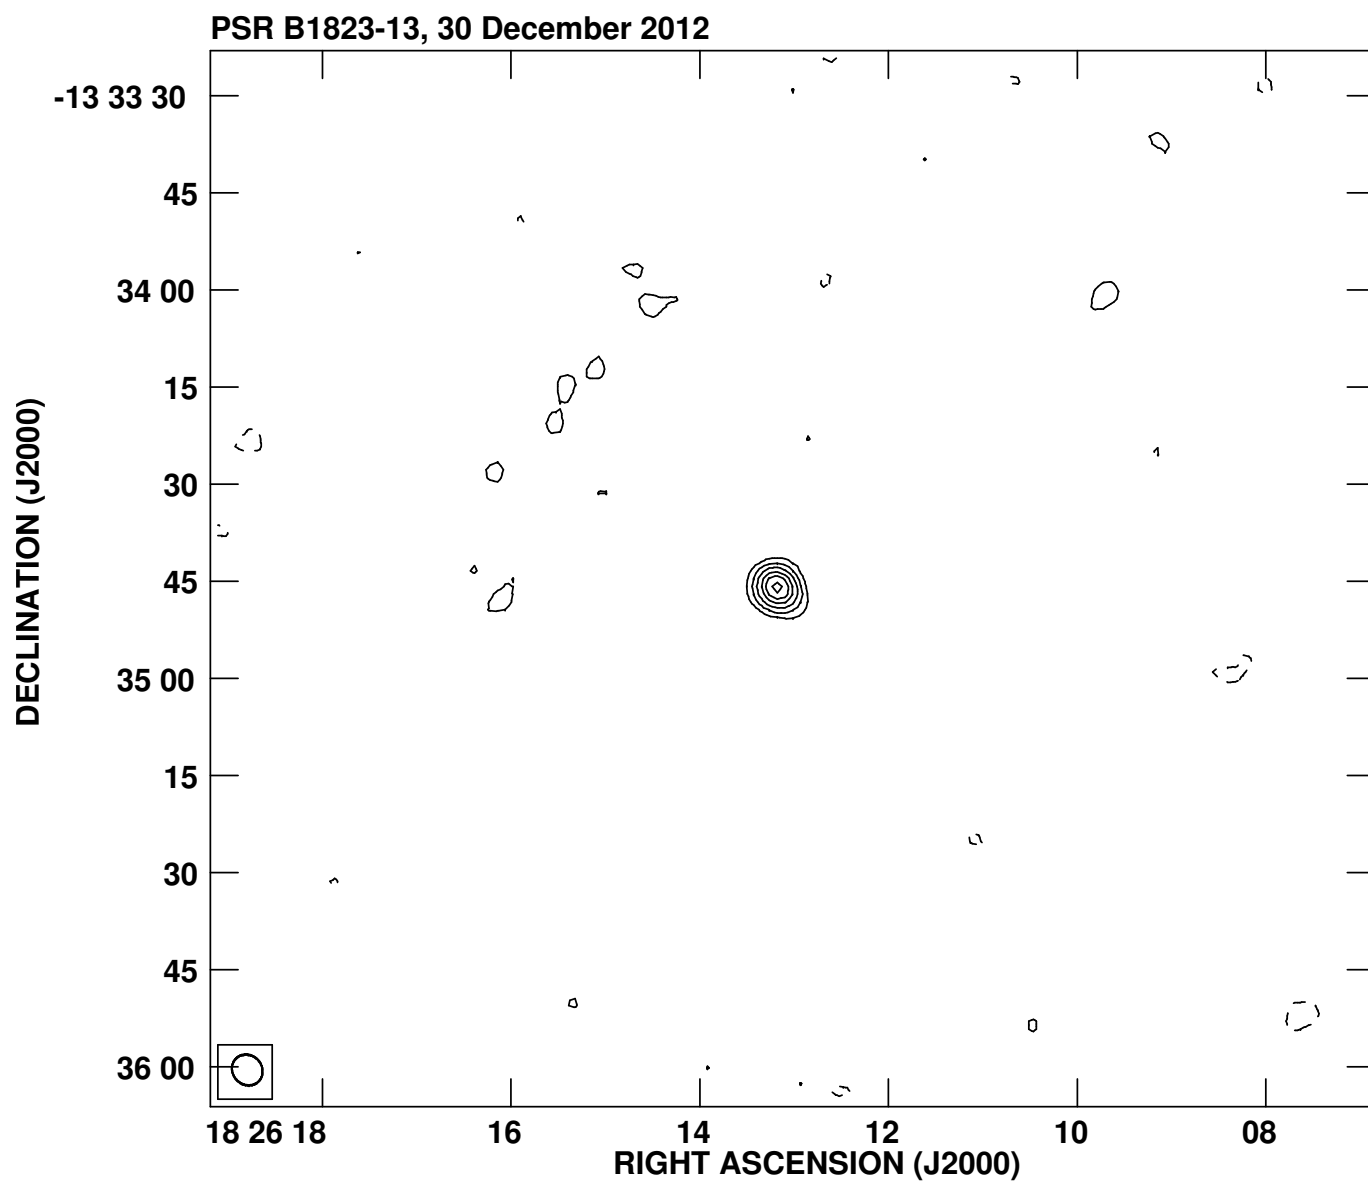

Cont.levels = 0.07 mJy (-5, -3, 3, 8, 15, 24, 33, 44)

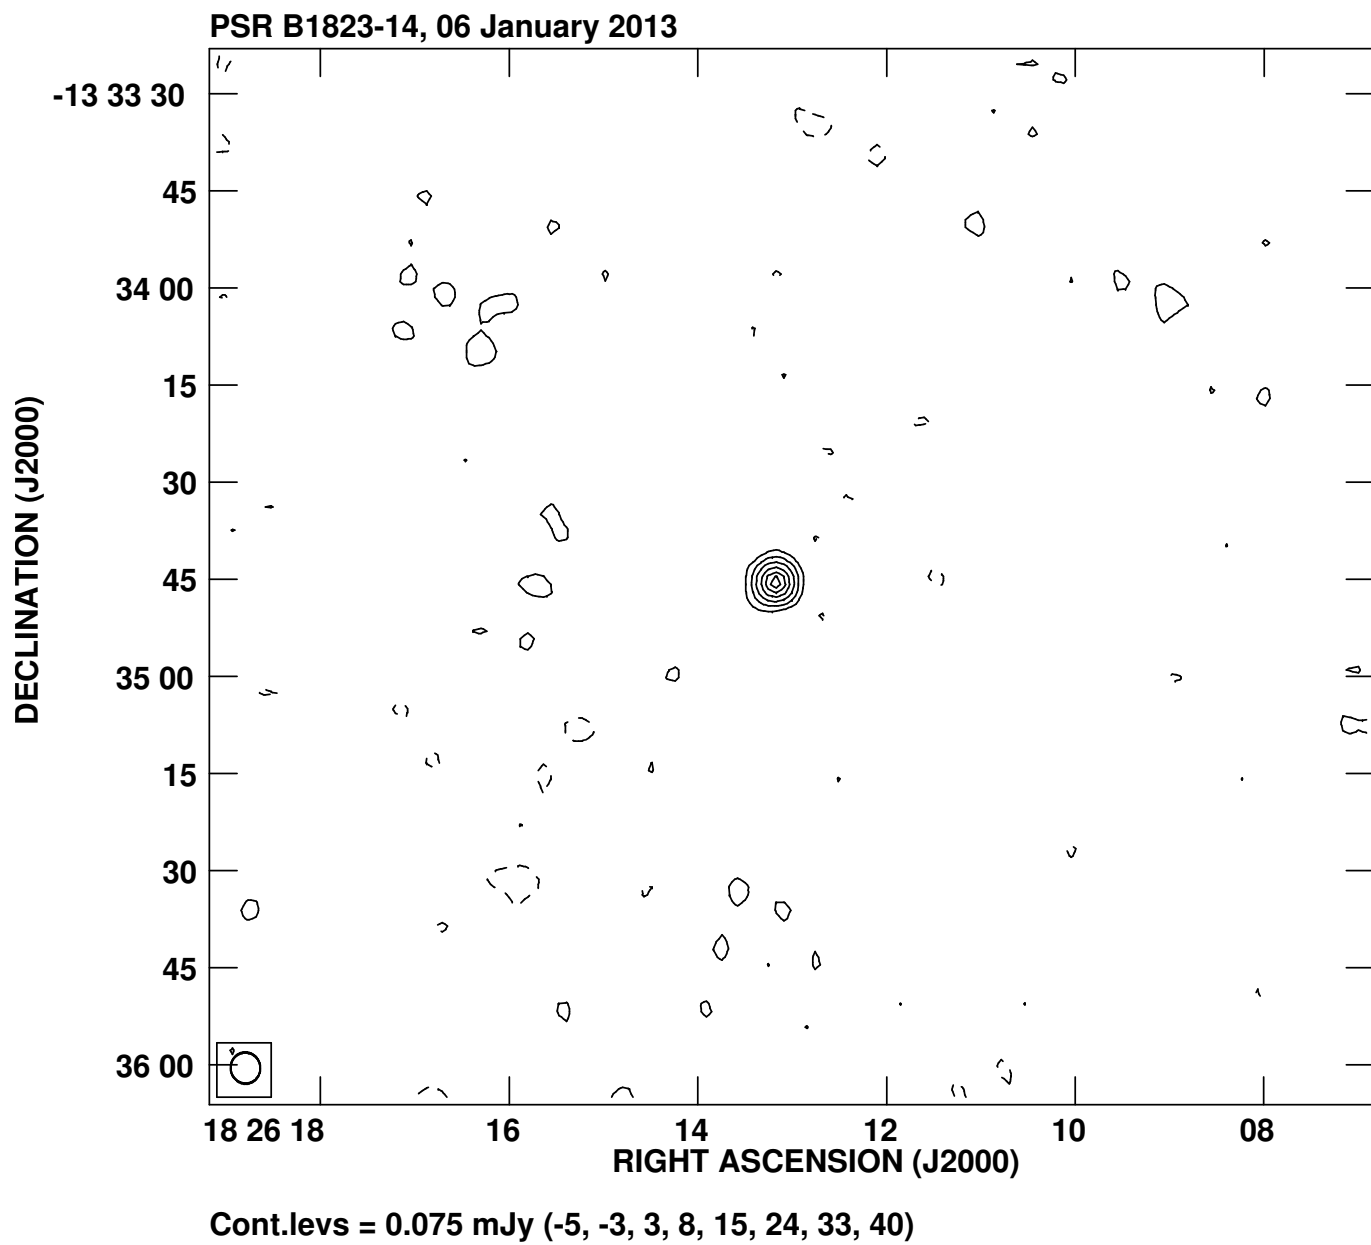

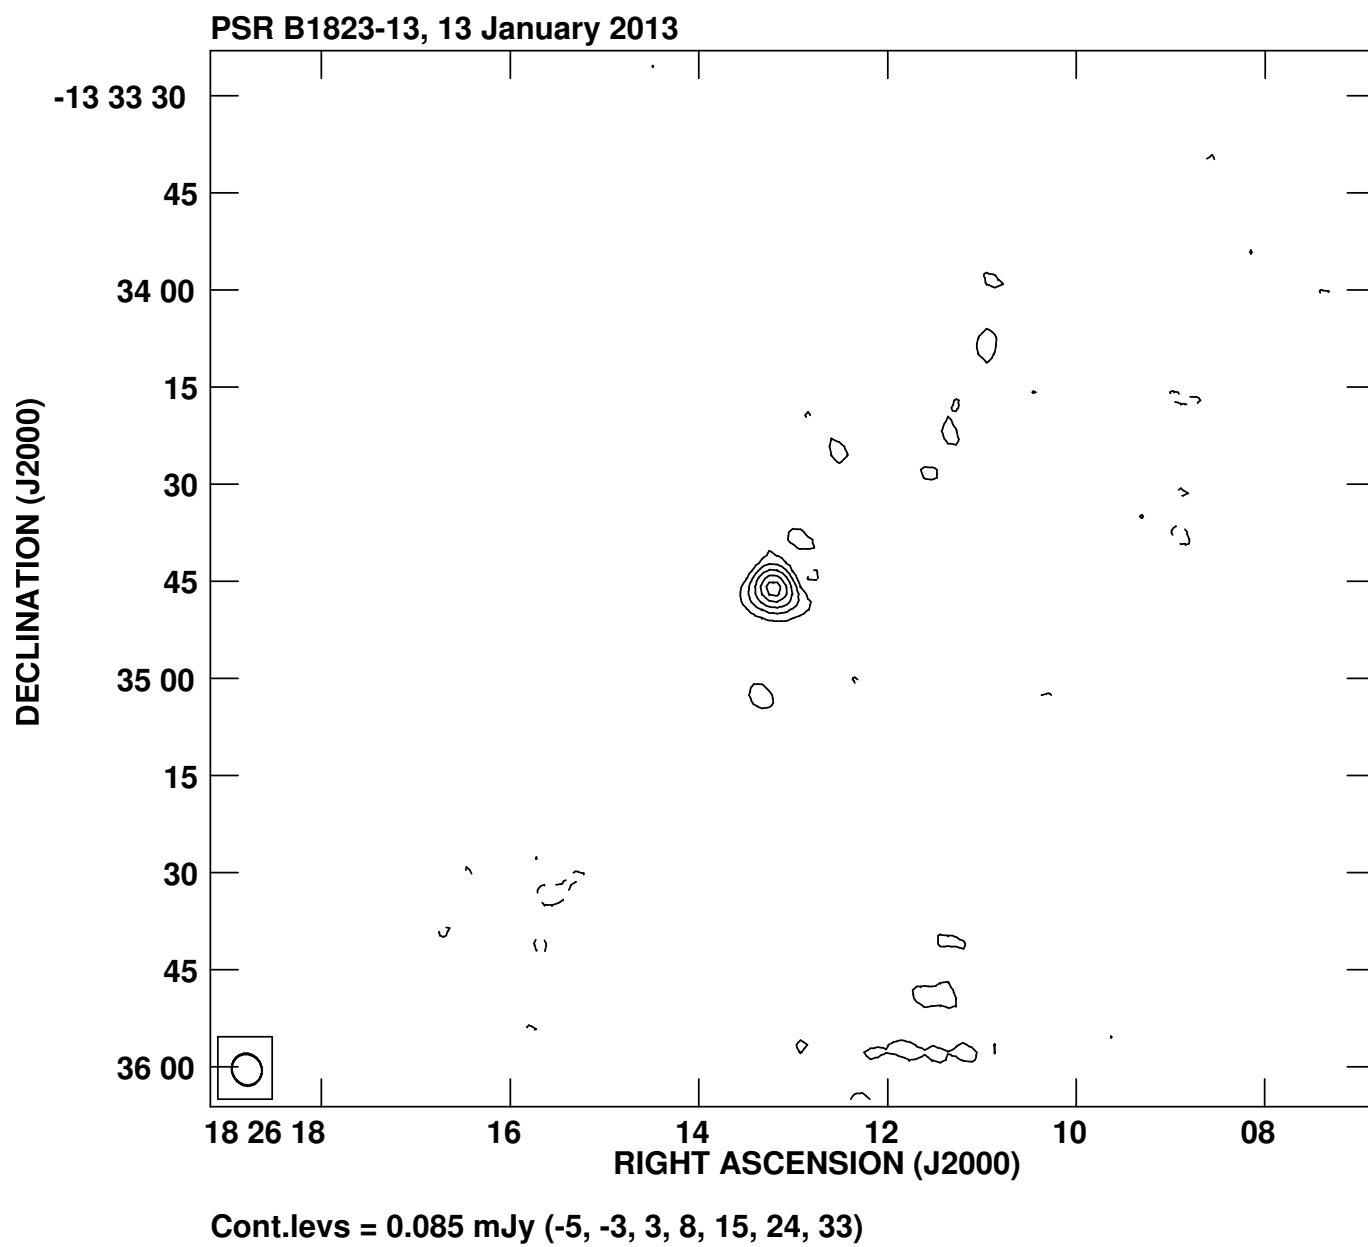

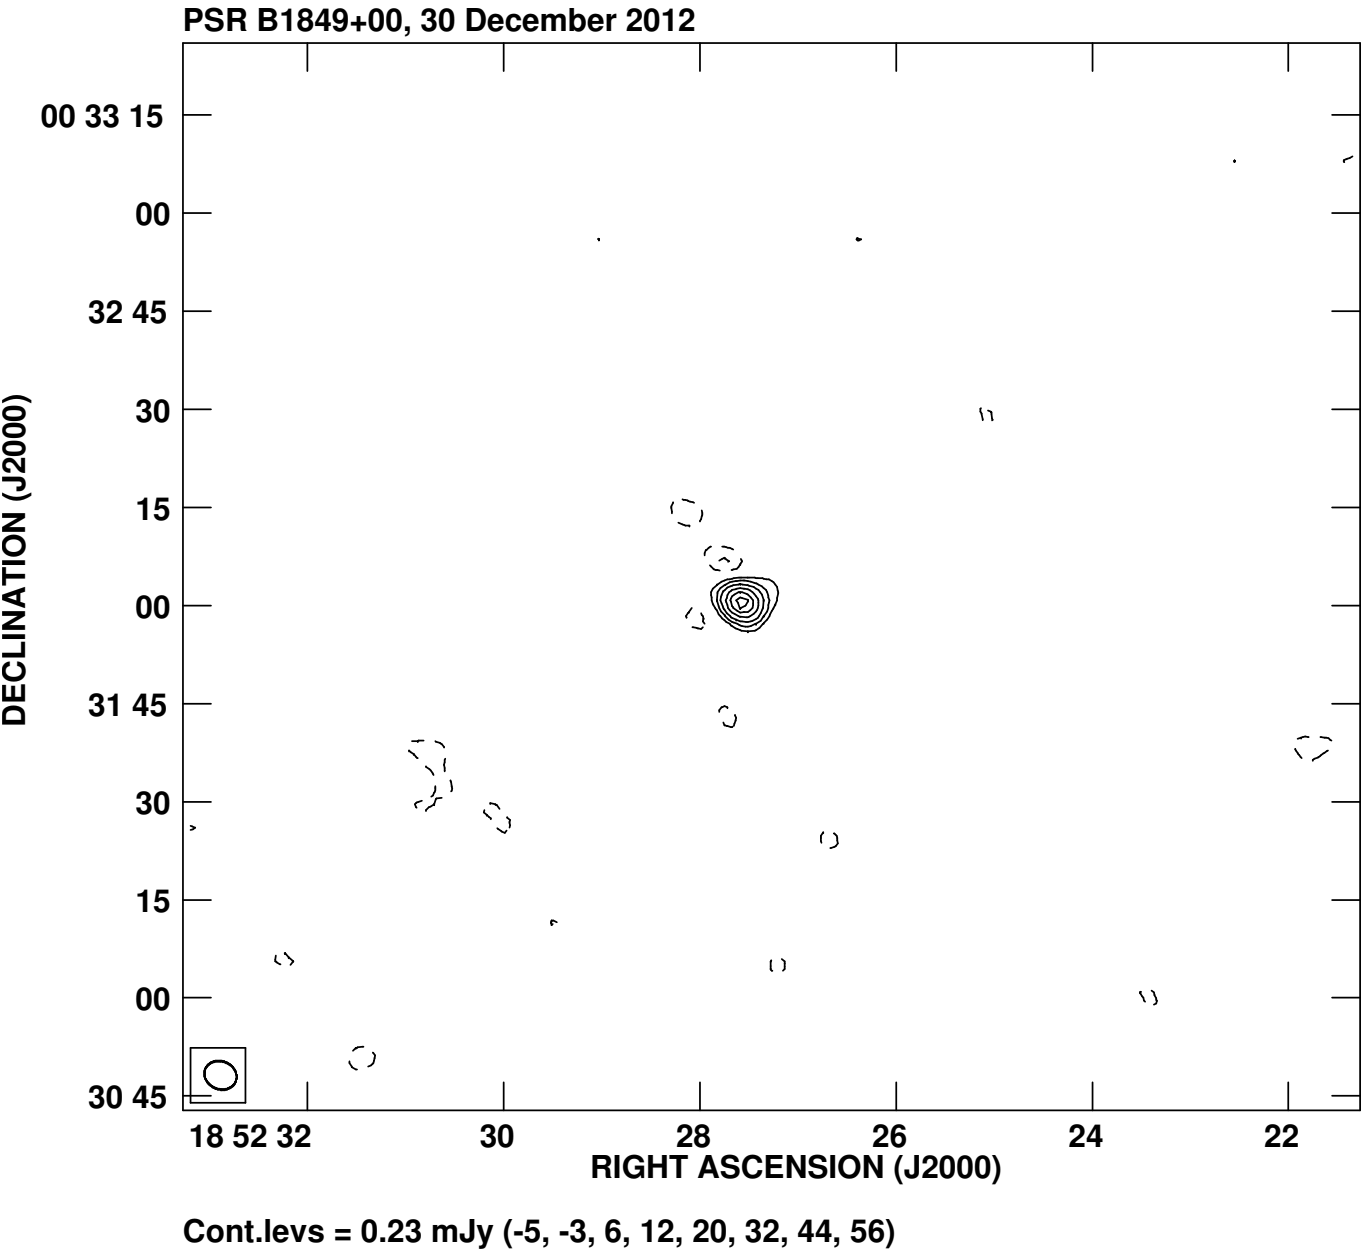



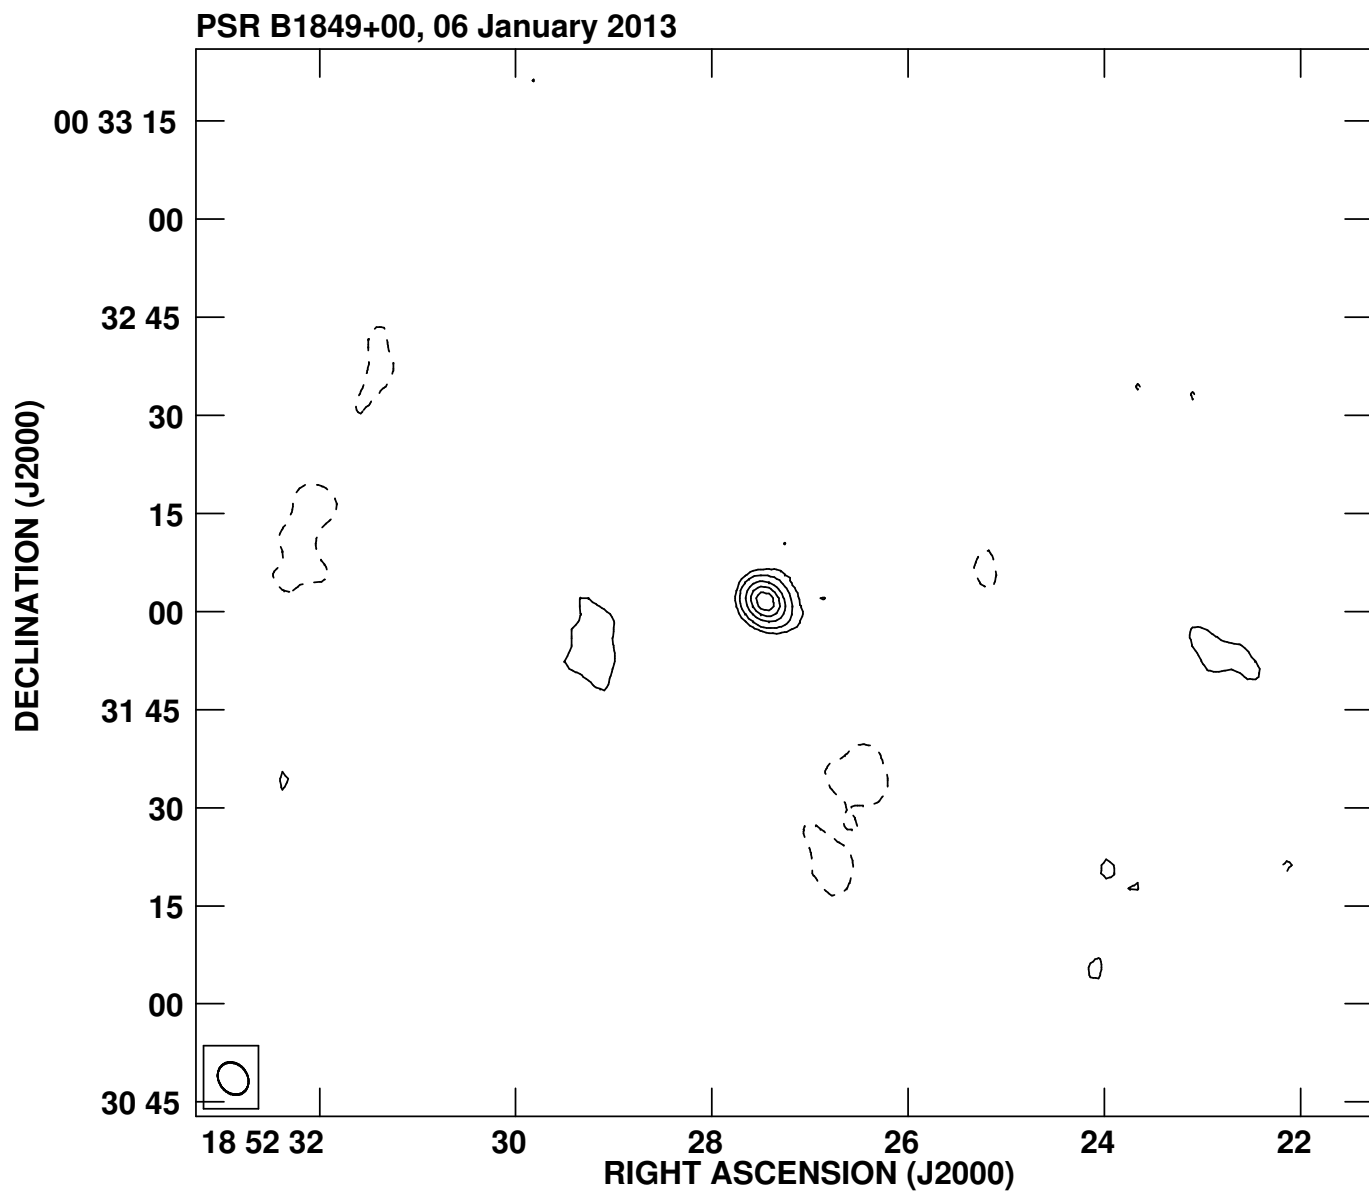

Cont.levs = 0.34 (-5, -3, 3, 7, 15, 24, 33, 44)

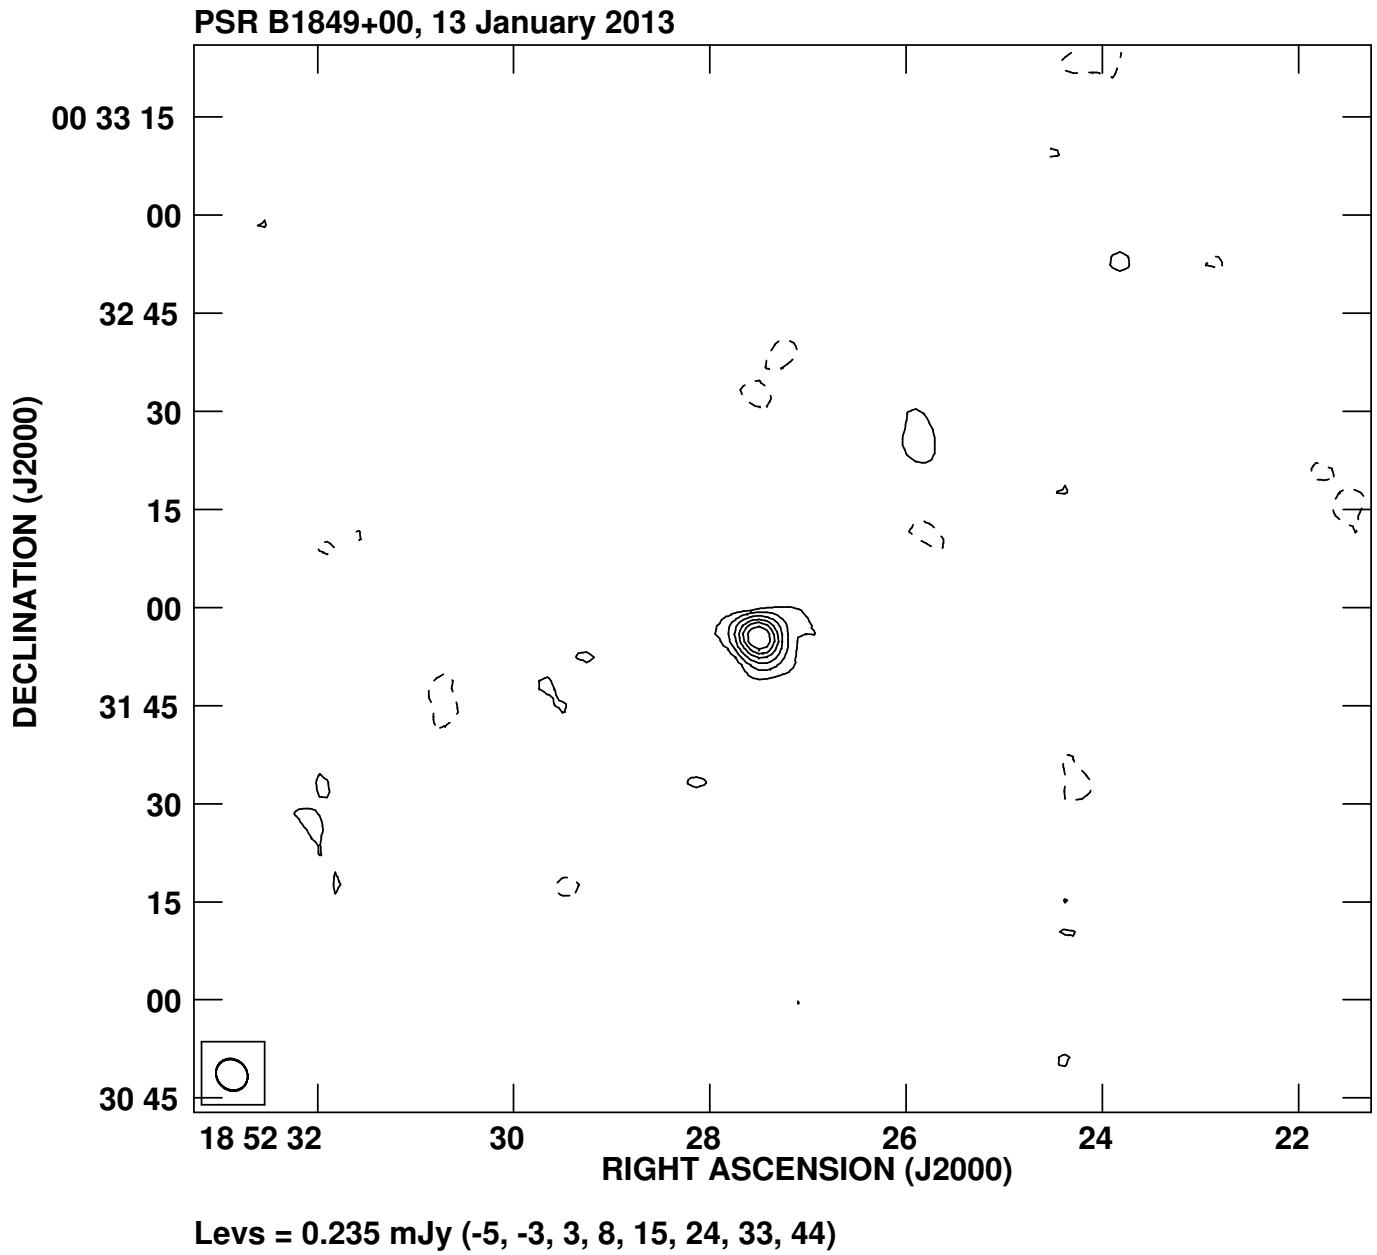

Supplement: stv333_Supplementary_Data.zip [file stv333_Supplementary_Data.zip]
